# Supplementary material for: 16HBE Cell Lipid Mediator Responses to Mono and Co-Infections with Respiratory Pathogens
Source: MDPI journal article supplement (doi:10.3390/metabo10030113), 2020-03-18
Supplement: s1 [file s1]

Supplemental material

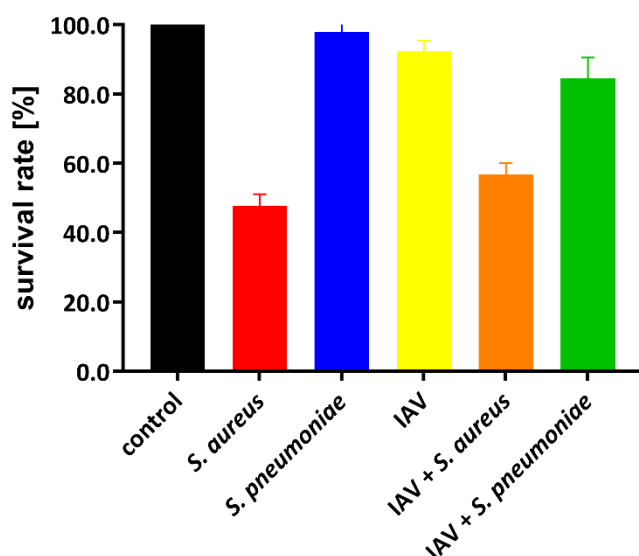

**Figure S1.** Survival rate of 16HBE cells under indicated infection conditions. 16HBE cells were infected ( $n=4$ ) as described in the method section. 6 h post bacterial infections the vital cells were detached and counted. Cell counts were normalized to the uninfected controls ( $n=15$ ) and are displayed as percentage of the uninfected control.

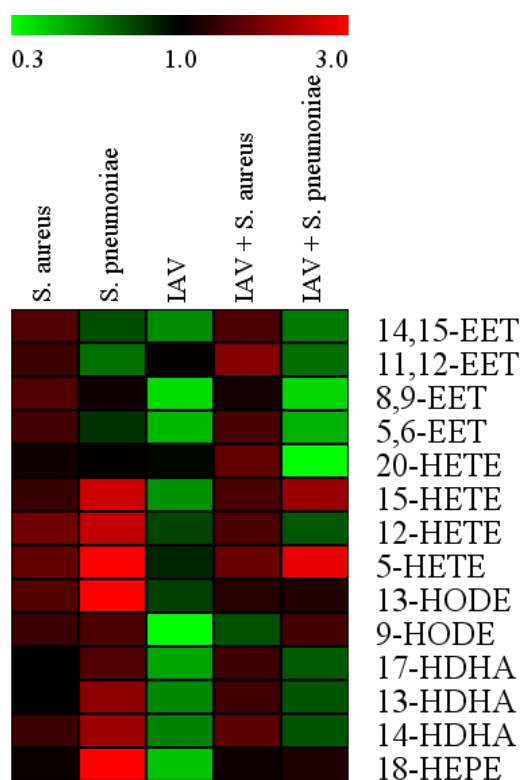

**Figure S2.** Heatmap displaying fold changes [infection ( $n=4$ )/control ( $n=15$ )] of measured lipid mediators. Decreased levels are shown in green and increased amounts in red.

**Table S1.** Optimized MRM parameters for analyzed lipid mediators with qualifier<sup>1</sup> and quantifier<sup>2</sup> ion. Grey lipid mediators were not detected.

| compound                  | precursor ion | product ion | fragmentor voltage [V] | collision energy [V] | cell accelerator voltage [V] | retention time [min] |
|---------------------------|---------------|-------------|------------------------|----------------------|------------------------------|----------------------|
| 14,15-EET <sup>1</sup>    | 319.2         | 219.1       | 100                    | 8                    | 4                            | 18.25                |
| 14,15-EET <sup>2</sup>    | 319.2         | 175.1       | 100                    | 10                   | 1                            | 18.25                |
| 11,12-EET <sup>1</sup>    | 319.2         | 179.0       | 100                    | 8                    | 1                            | 18.50                |
| 11,12-EET <sup>2</sup>    | 319.2         | 167.2       | 100                    | 12                   | 2                            | 18.50                |
| 8,9-EET <sup>1</sup>      | 319.2         | 154.9       | 100                    | 8                    | 1                            | 18.40                |
| 8,9-EET <sup>2</sup>      | 319.2         | 151.0       | 100                    | 10                   | 1                            | 18.40                |
| 5,6-EET <sup>1</sup>      | 319.2         | 191.0       | 100                    | 2                    | 1                            | 18.60                |
| 5,6-EET <sup>2</sup>      | 319.2         | 99.0        | 100                    | 16                   | 1                            | 18.60                |
| 5,15-DiHETE <sup>1</sup>  | 335.3         | 255.3       | 100                    | 12                   | 3                            | 15.50                |
| 5,15-DiHETE <sup>2</sup>  | 335.3         | 173.2       | 100                    | 12                   | 6                            | 15.50                |
| 20-HETE <sup>1</sup>      | 319.2         | 288.9       | 140                    | 12                   | 2                            | 16.90                |
| 20-HETE <sup>2</sup>      | 319.2         | 237.0       | 140                    | 10                   | 3                            | 16.90                |
| 15-HETE <sup>1</sup>      | 319.2         | 219.2       | 120                    | 4                    | 4                            | 17.45                |
| 15-HETE <sup>2</sup>      | 319.2         | 120.9       | 120                    | 12                   | 3                            | 17.45                |
| 12-HETE <sup>1</sup>      | 319.2         | 163.0       | 120                    | 12                   | 1                            | 17.70                |
| 12-HETE <sup>2</sup>      | 319.2         | 135.2       | 120                    | 12                   | 3                            | 17.70                |
| 5-HETE <sup>1</sup>       | 319.2         | 203.3       | 100                    | 12                   | 5                            | 17.80                |
| 13-HOTrE <sup>1</sup>     | 293.2         | 224.0       | 100                    | 10                   | 4                            | 16.80                |
| 13-HOTrE <sup>2</sup>     | 293.2         | 210.8       | 100                    | 6                    | 4                            | 16.80                |
| 13-HODE <sup>1</sup>      | 295.2         | 195.1       | 100                    | 14                   | 1                            | 17.25                |
| 13-HODE <sup>2</sup>      | 295.2         | 277.2       | 100                    | 10                   | 2                            | 17.25                |
| 9-HODE <sup>1</sup>       | 295.2         | 171.0       | 100                    | 10                   | 1                            | 17.30                |
| 9-HODE <sup>2</sup>       | 295.2         | 123.1       | 100                    | 14                   | 3                            | 17.30                |
| 17-HDHA <sup>1</sup>      | 343.2         | 245.1       | 100                    | 8                    | 3                            | 17.50                |
| 17-HDHA <sup>2</sup>      | 343.2         | 201.1       | 100                    | 10                   | 4                            | 17.50                |
| 14-HDHA <sup>1</sup>      | 343.2         | 234.1       | 100                    | 10                   | 4                            | 17.60                |
| 14-HDHA <sup>2</sup>      | 343.2         | 161.2       | 100                    | 8                    | 1                            | 17.60                |
| 13-HDHA <sup>1</sup>      | 343.2         | 193.1       | 80                     | 10                   | 3                            | 17.65                |
| 13-HDHA <sup>2</sup>      | 343.2         | 221.0       | 80                     | 12                   | 5                            | 17.65                |
| 18-HEPE <sup>1</sup>      | 317.2         | 215.0       | 80                     | 10                   | 4                            | 16.75                |
| 18-HEPE <sup>2</sup>      | 317.2         | 259.0       | 80                     | 6                    | 3                            | 16.75                |
| 15-HEPE <sup>1</sup>      | 317.2         | 255.3       | 100                    | 4                    | 2                            | 17.00                |
| 15-HEPE <sup>2</sup>      | 317.2         | 219.2       | 100                    | 4                    | 4                            | 17.00                |
| Protectin DX <sup>1</sup> | 359.2         | 206.1       | 100                    | 12                   | 4                            | 15.70                |
| Protectin DX <sup>2</sup> | 359.2         | 153.1       | 100                    | 12                   | 1                            | 15.70                |
| Resolvin D5 <sup>1</sup>  | 359.2         | 199.2       | 80                     | 10                   | 5                            | 15.65                |
| Resolvin D5 <sup>2</sup>  | 359.2         | 141.0       | 80                     | 10                   | 2                            | 15.65                |
| Leukotriene B4            | 335.2         | 194.9       | 120                    | 8                    | 6                            | 15.70                |
| Leukotriene B4            | 335.2         | 58.9        | 120                    | 6                    | 3                            | 15.70                |
| Leukotriene E4            | 438.2         | 351.1       | 100                    | 14                   | 4                            | 14.70                |
| Leukotriene E4            | 438.2         | 333.0       | 100                    | 12                   | 5                            | 14.70                |
| 12-HETE-d8                | 327.2         | 214.0       | 100                    | 12                   | 4                            | 17.70                |
| 13-HODE-d4                | 299.3         | 198.2       | 100                    | 14                   | 6                            | 17.25                |

**Table S2.** Calculated p-values from Mann Whitey test.

| lipid mediator | group                      |     | reference | p value | adjusted p value |
|----------------|----------------------------|-----|-----------|---------|------------------|
| 14,15-EET      | <i>S. aureus</i>           | vs. | control   | 0.0273  | >0.9999          |
| 14,15-EET      | <i>S. pneumoniae</i>       | vs. | control   | 0.4107  | >0.9999          |
| 14,15-EET      | IAV                        | vs. | control   | 0.0366  | >0.9999          |
| 14,15-EET      | IAV + <i>S. aureus</i>     | vs. | control   | 0.0062  | 0.279            |
| 14,15-EET      | IAV + <i>S. pneumoniae</i> | vs. | control   | 0.1522  | >0.9999          |
| 11,12-EET      | <i>S. aureus</i>           | vs. | control   | 0.0485  | >0.9999          |
| 11,12-EET      | <i>S. pneumoniae</i>       | vs. | control   | 0.5304  | >0.9999          |
| 11,12-EET      | IAV                        | vs. | control   | 0.4107  | >0.9999          |
| 11,12-EET      | IAV + <i>S. aureus</i>     | vs. | control   | 0.0093  | 0.4185           |
| 11,12-EET      | IAV + <i>S. pneumoniae</i> | vs. | control   | 0.4107  | >0.9999          |
| 8,9-EET        | <i>S. aureus</i>           | vs. | control   | 0.0093  | 0.4185           |
| 8,9-EET        | <i>S. pneumoniae</i>       | vs. | control   | 0.5304  | >0.9999          |
| 8,9-EET        | IAV                        | vs. | control   | 0.001   | 0.045            |
| 8,9-EET        | IAV + <i>S. aureus</i>     | vs. | control   | 0.5304  | >0.9999          |
| 8,9-EET        | IAV + <i>S. pneumoniae</i> | vs. | control   | 0.0062  | 0.279            |
| 5,6-EET        | <i>S. aureus</i>           | vs. | control   | 0.08    | >0.9999          |
| 5,6-EET        | <i>S. pneumoniae</i>       | vs. | control   | 0.7363  | >0.9999          |
| 5,6-EET        | IAV                        | vs. | control   | 0.0196  | 0.882            |
| 5,6-EET        | IAV + <i>S. aureus</i>     | vs. | control   | 0.0624  | >0.9999          |
| 5,6-EET        | IAV + <i>S. pneumoniae</i> | vs. | control   | 0.0366  | >0.9999          |
| 20-HETE        | <i>S. aureus</i>           | vs. | control   | 0.2208  | >0.9999          |
| 20-HETE        | <i>S. pneumoniae</i>       | vs. | control   | 0.469   | >0.9999          |
| 20-HETE        | IAV                        | vs. | control   | 0.9613  | >0.9999          |
| 20-HETE        | IAV + <i>S. aureus</i>     | vs. | control   | 0.08    | >0.9999          |
| 20-HETE        | IAV + <i>S. pneumoniae</i> | vs. | control   | 0.0005  | 0.0225           |
| 15-HETE        | <i>S. aureus</i>           | vs. | control   | 0.0366  | >0.9999          |
| 15-HETE        | <i>S. pneumoniae</i>       | vs. | control   | 0.0005  | 0.0225           |
| 15-HETE        | IAV                        | vs. | control   | 0.0196  | 0.882            |
| 15-HETE        | IAV + <i>S. aureus</i>     | vs. | control   | 0.0139  | 0.6255           |
| 15-HETE        | IAV + <i>S. pneumoniae</i> | vs. | control   | 0.0021  | 0.0945           |
| 12-HETE        | <i>S. aureus</i>           | vs. | control   | 0.0005  | 0.0225           |
| 12-HETE        | <i>S. pneumoniae</i>       | vs. | control   | 0.0005  | 0.0225           |
| 12-HETE        | IAV                        | vs. | control   | 0.2208  | >0.9999          |
| 12-HETE        | IAV + <i>S. aureus</i>     | vs. | control   | 0.0093  | 0.4185           |
| 12-HETE        | IAV + <i>S. pneumoniae</i> | vs. | control   | 0.1847  | >0.9999          |
| 5-HETE         | <i>S. aureus</i>           | vs. | control   | 0.0005  | 0.0225           |
| 5-HETE         | <i>S. pneumoniae</i>       | vs. | control   | 0.0005  | 0.0225           |
| 5-HETE         | IAV                        | vs. | control   | 0.4107  | >0.9999          |
| 5-HETE         | IAV + <i>S. aureus</i>     | vs. | control   | 0.0005  | 0.0225           |
| 5-HETE         | IAV + <i>S. pneumoniae</i> | vs. | control   | 0.0005  | 0.0225           |
| 13-HODE        | <i>S. aureus</i>           | vs. | control   | 0.08    | >0.9999          |
| 13-HODE        | <i>S. pneumoniae</i>       | vs. | control   | 0.0005  | 0.0225           |

|         |                            |     |         |         |         |
|---------|----------------------------|-----|---------|---------|---------|
| 13-HODE | IAV                        | vs. | control | 0.5304  | >0.9999 |
| 13-HODE | IAV + <i>S. aureus</i>     | vs. | control | 0.307   | >0.9999 |
| 13-HODE | IAV + <i>S. pneumoniae</i> | vs. | control | 0.2208  | >0.9999 |
| 9-HODE  | <i>S. aureus</i>           | vs. | control | 0.2208  | >0.9999 |
| 9-HODE  | <i>S. pneumoniae</i>       | vs. | control | 0.0093  | 0.4185  |
| 9-HODE  | IAV                        | vs. | control | 0.001   | 0.045   |
| 9-HODE  | IAV + <i>S. aureus</i>     | vs. | control | 0.3571  | >0.9999 |
| 9-HODE  | IAV + <i>S. pneumoniae</i> | vs. | control | 0.307   | >0.9999 |
| 17-HDHA | <i>S. aureus</i>           | vs. | control | 0.3571  | >0.9999 |
| 17-HDHA | <i>S. pneumoniae</i>       | vs. | control | 0.0062  | 0.279   |
| 17-HDHA | IAV                        | vs. | control | 0.0036  | 0.162   |
| 17-HDHA | IAV + <i>S. aureus</i>     | vs. | control | 0.0093  | 0.4185  |
| 17-HDHA | IAV + <i>S. pneumoniae</i> | vs. | control | 0.0273  | >0.9999 |
| 13-HDHA | <i>S. aureus</i>           | vs. | control | >0.9999 | >0.9999 |
| 13-HDHA | <i>S. pneumoniae</i>       | vs. | control | 0.0005  | 0.0225  |
| 13-HDHA | IAV                        | vs. | control | 0.0273  | >0.9999 |
| 13-HDHA | IAV + <i>S. aureus</i>     | vs. | control | 0.0366  | >0.9999 |
| 13-HDHA | IAV + <i>S. pneumoniae</i> | vs. | control | 0.1522  | >0.9999 |
| 14-HDHA | <i>S. aureus</i>           | vs. | control | 0.156   | >0.9999 |
| 14-HDHA | <i>S. pneumoniae</i>       | vs. | control | 0.0007  | 0.0315  |
| 14-HDHA | IAV                        | vs. | control | 0.0464  | >0.9999 |
| 14-HDHA | IAV + <i>S. aureus</i>     | vs. | control | 0.0118  | 0.531   |
| 14-HDHA | IAV + <i>S. pneumoniae</i> | vs. | control | 0.1268  | >0.9999 |
| 18-HEPE | <i>S. aureus</i>           | vs. | control | 0.9613  | >0.9999 |
| 18-HEPE | <i>S. pneumoniae</i>       | vs. | control | 0.0005  | 0.0225  |
| 18-HEPE | IAV                        | vs. | control | 0.0036  | 0.162   |
| 18-HEPE | IAV + <i>S. aureus</i>     | vs. | control | 0.5965  | >0.9999 |
| 18-HEPE | IAV + <i>S. pneumoniae</i> | vs. | control | 0.3571  | >0.9999 |

Table S3. Spearman's rang correlation

|           | 14,15-EET | 11,12-EET | 8,9-EET | 5,6-EET | 20-HETE | 15-HETE | 12-HETE | 5-HETE | 13-HODE | 9-HODE | 17-HDHA | 13-HDHA | 14-HDHA | 18-HEPE |
|-----------|-----------|-----------|---------|---------|---------|---------|---------|--------|---------|--------|---------|---------|---------|---------|
| 14,15-EET |           | 0.831     | 0.803   | 0.912   | 0.421   | 0.045   | 0.562   | 0.181  | 0.376   | 0.082  | 0.310   | 0.411   | 0.500   | 0.159   |
| 11,12-EET | 0.831     |           | 0.553   | 0.794   | 0.490   | -0.111  | 0.444   | 0.050  | 0.268   | -0.288 | 0.075   | 0.248   | 0.317   | -0.131  |
| 8,9-EET   | 0.803     | 0.553     |         | 0.894   | 0.485   | 0.133   | 0.714   | 0.223  | 0.395   | 0.222  | 0.496   | 0.627   | 0.717   | 0.418   |
| 5,6-EET   | 0.912     | 0.794     | 0.894   |         | 0.574   | 0.100   | 0.675   | 0.180  | 0.381   | 0.054  | 0.418   | 0.569   | 0.631   | 0.247   |
| 20-HETE   | 0.421     | 0.490     | 0.485   | 0.574   |         | 0.115   | 0.645   | 0.145  | 0.291   | -0.203 | 0.530   | 0.642   | 0.638   | 0.199   |
| 15-HETE   | 0.045     | -0.111    | 0.133   | 0.100   | 0.115   |         | 0.441   | 0.863  | 0.436   | 0.638  | 0.559   | 0.468   | 0.520   | 0.630   |
| 12-HETE   | 0.562     | 0.444     | 0.714   | 0.675   | 0.645   | 0.441   |         | 0.599  | 0.684   | 0.210  | 0.575   | 0.808   | 0.917   | 0.584   |
| 5-HETE    | 0.181     | 0.050     | 0.223   | 0.180   | 0.145   | 0.863   | 0.599   |        | 0.678   | 0.535  | 0.459   | 0.534   | 0.608   | 0.676   |
| 13-HODE   | 0.376     | 0.268     | 0.395   | 0.381   | 0.291   | 0.436   | 0.684   | 0.678  |         | 0.285  | 0.235   | 0.563   | 0.550   | 0.445   |
| 9-HODE    | 0.082     | -0.288    | 0.222   | 0.054   | -0.203  | 0.638   | 0.210   | 0.535  | 0.285   |        | 0.414   | 0.241   | 0.308   | 0.566   |
| 17-HDHA   | 0.310     | 0.075     | 0.496   | 0.418   | 0.530   | 0.559   | 0.575   | 0.459  | 0.235   | 0.414  |         | 0.830   | 0.795   | 0.715   |
| 13-HDHA   | 0.411     | 0.248     | 0.627   | 0.569   | 0.642   | 0.468   | 0.808   | 0.534  | 0.563   | 0.241  | 0.830   |         | 0.905   | 0.799   |
| 14-HDHA   | 0.500     | 0.317     | 0.717   | 0.631   | 0.638   | 0.520   | 0.917   | 0.608  | 0.550   | 0.308  | 0.795   | 0.905   |         | 0.727   |
| 18-HEPE   | 0.159     | -0.131    | 0.418   | 0.247   | 0.199   | 0.630   | 0.584   | 0.676  | 0.445   | 0.566  | 0.715   | 0.799   | 0.727   |         |
